# Supplementary material
Source: PubMed Central journal article supplement (PMC5461535)
Supplement: 10.1074_M116.064444_mcp.M116.064444-2.pdf [file 10.1074_M116.064444_mcp.M116.064444-2.pdf]

# Cathepsin L1

## Glycoproteomic experiment #1

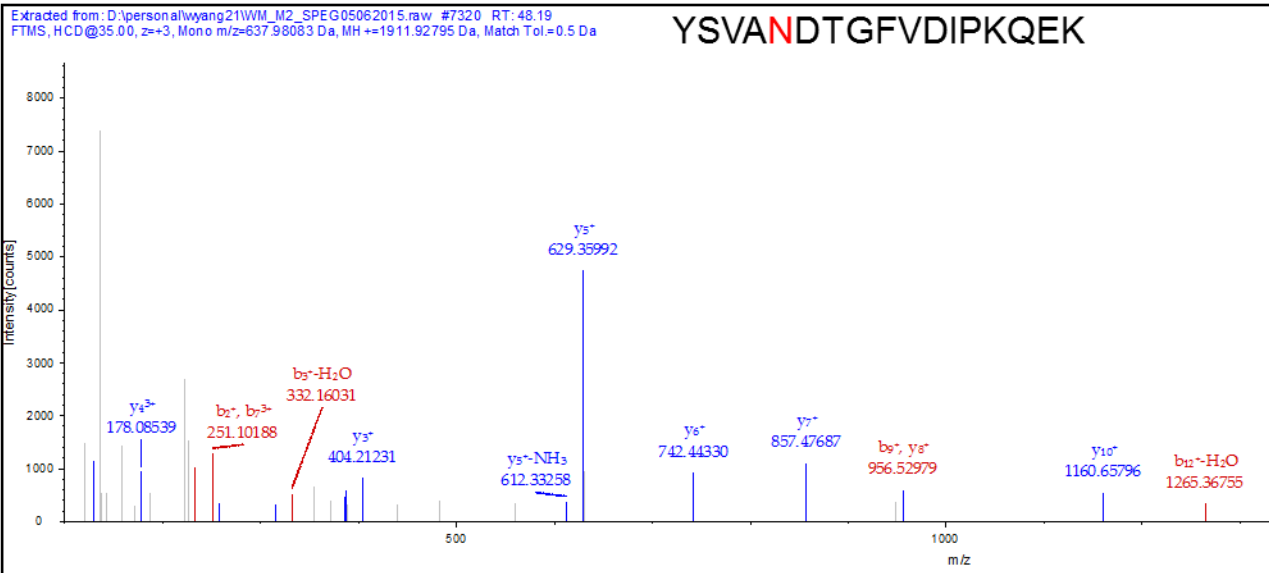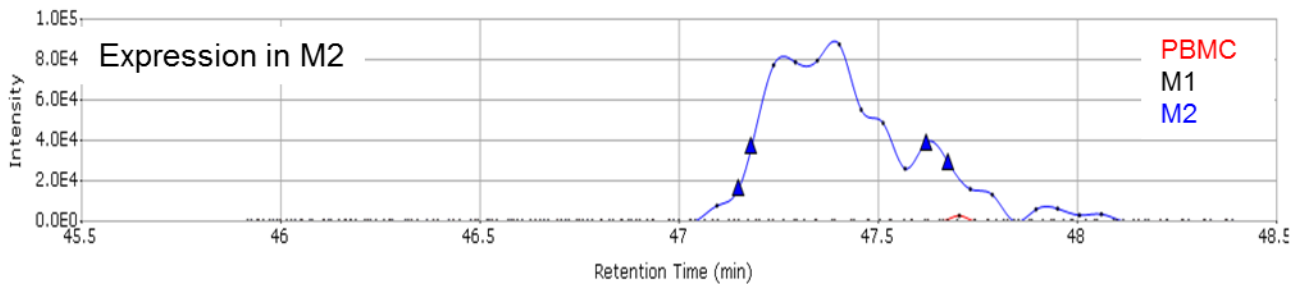

## Glycoproteomic experiment #2

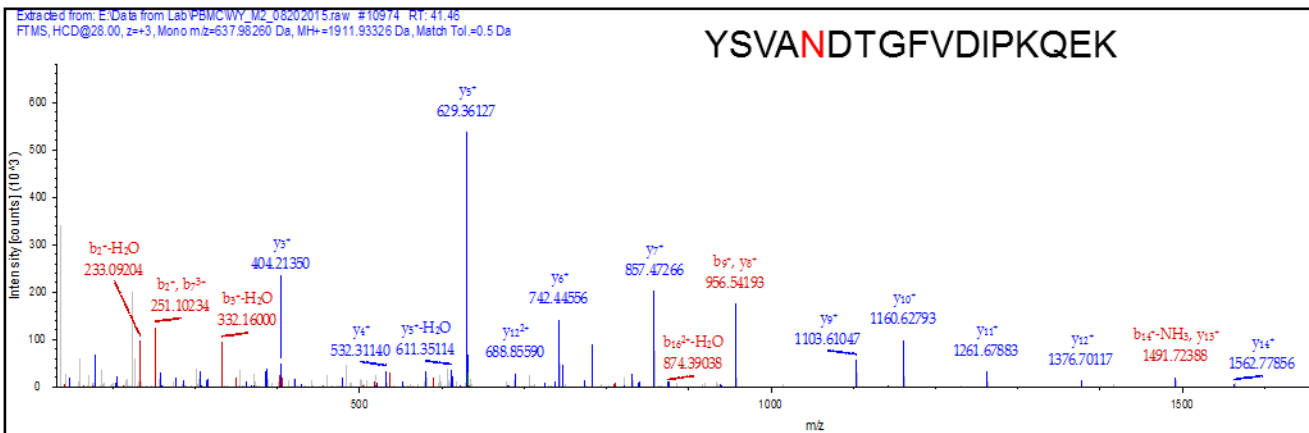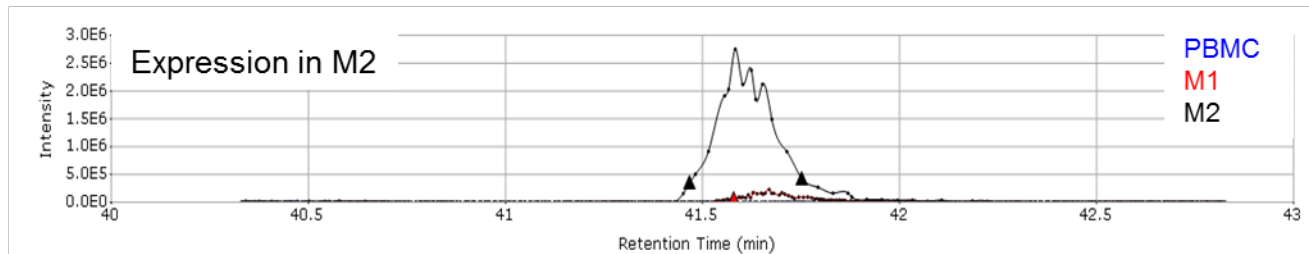

**Figure S1. Differential expression of cathepsin L1 in the glycoproteomic experiments.** In either glycoproteomic experiments, the MS/MS spectrum for peptide identification followed by label-free quantitation detecting precursor ions over retention time were shown.

# Macrophage mannose receptor 1 (CD206)

## Glycoproteomic experiment #1

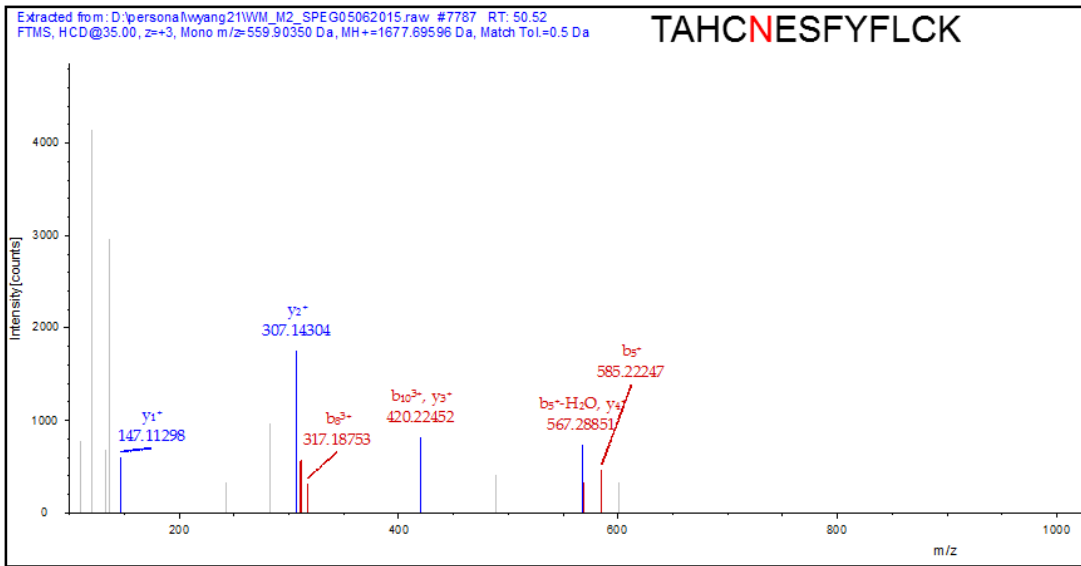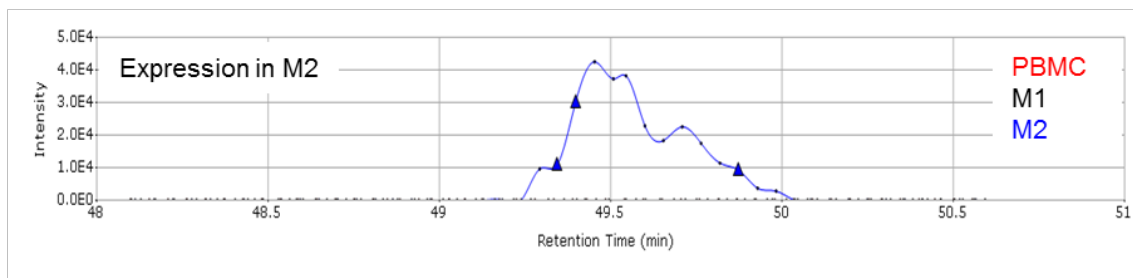

## Glycoproteomic experiment #2

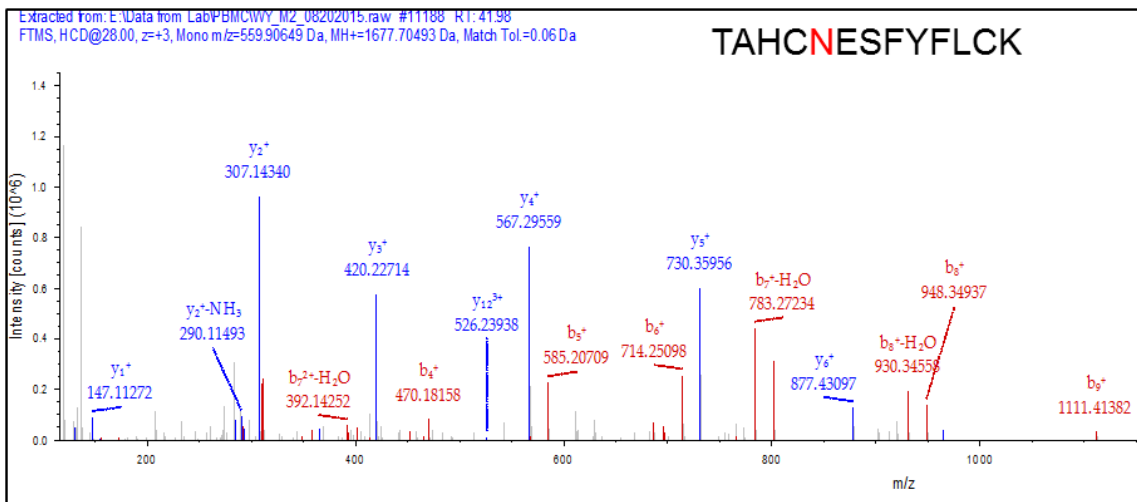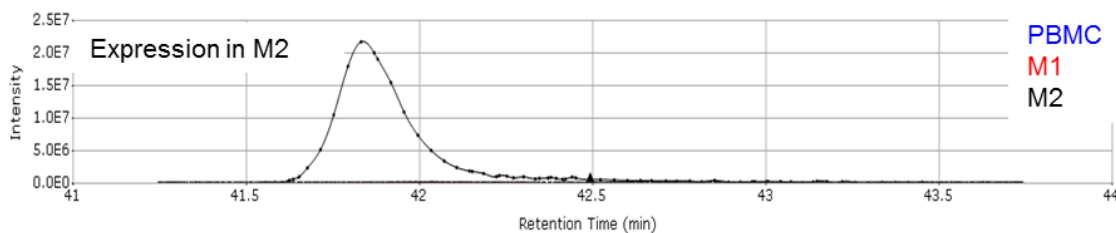

**Figure S2. Differential expression of macrophage mannose receptor 1 (CD206) in the glycoproteomic experiments.** In either glycoproteomic experiments, the MS/MS spectrum for peptide identification followed by label-free quantitation detecting precursor ions over retention time were shown.

# Integrin alpha 3

## Glycoproteomic experiment #1

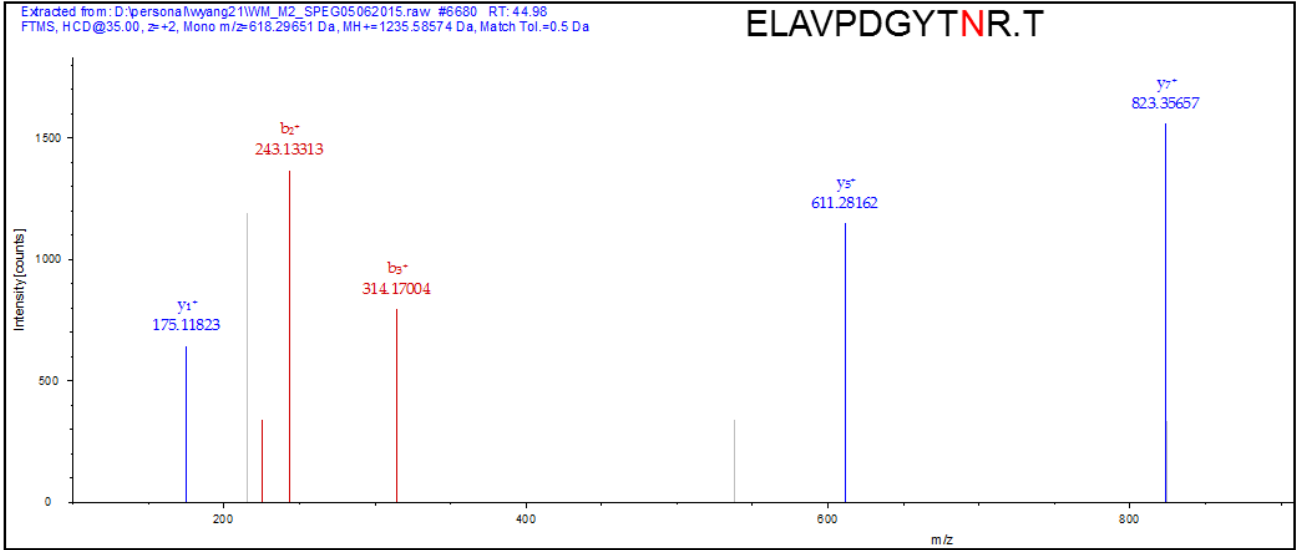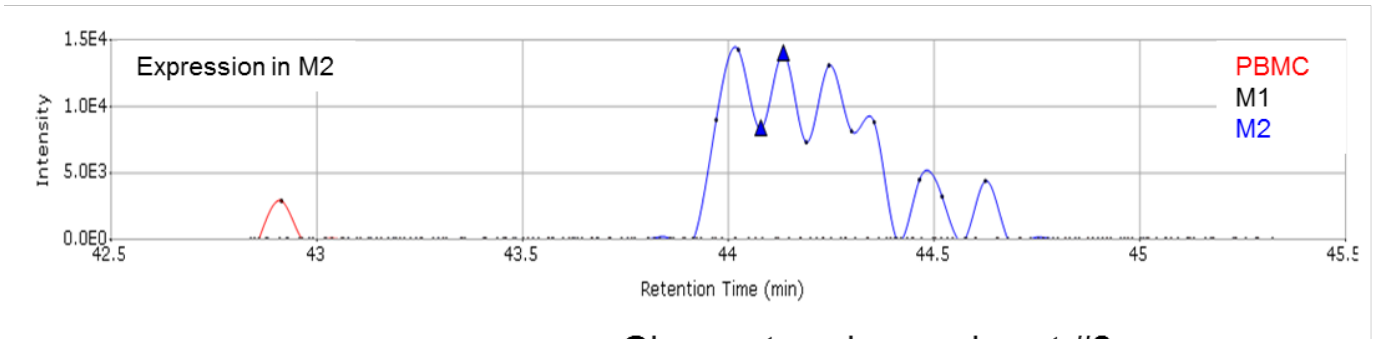

## Glycoproteomic experiment #2

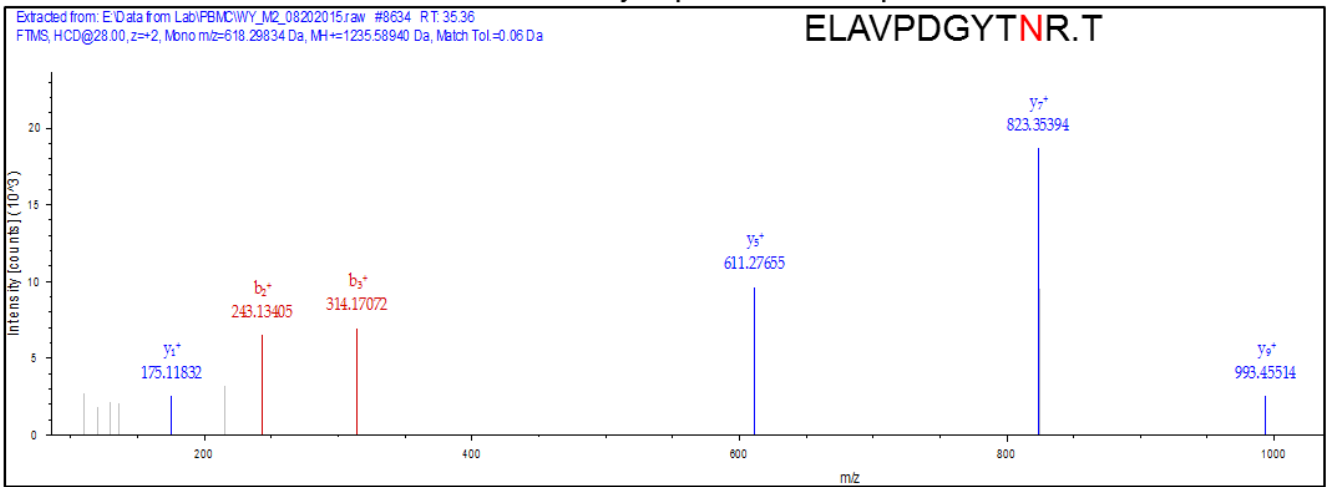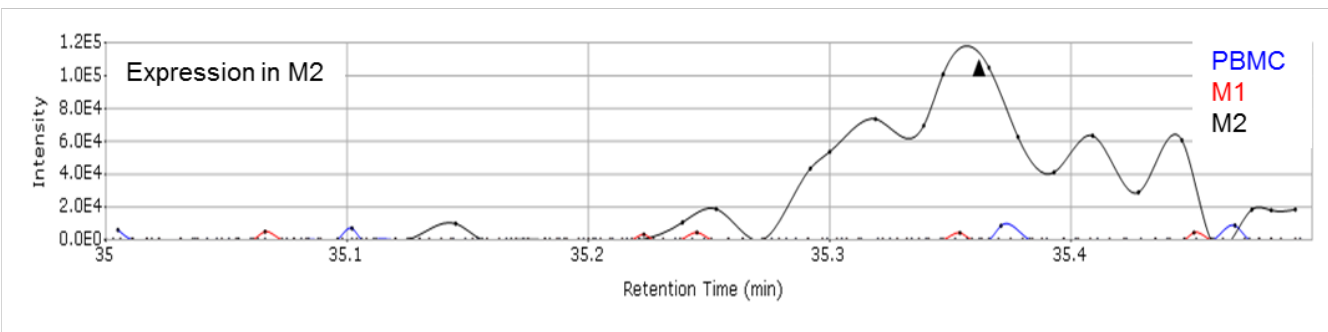

**Figure S3. Differential expression of integrin alpha 3 in the glycoproteomic experiments.** In either glycoproteomic experiments, the MS/MS spectrum for peptide identification followed by label-free quantitation detecting precursor ions over retention time were shown.

# Legumain

## Glycoproteomic experiment #1

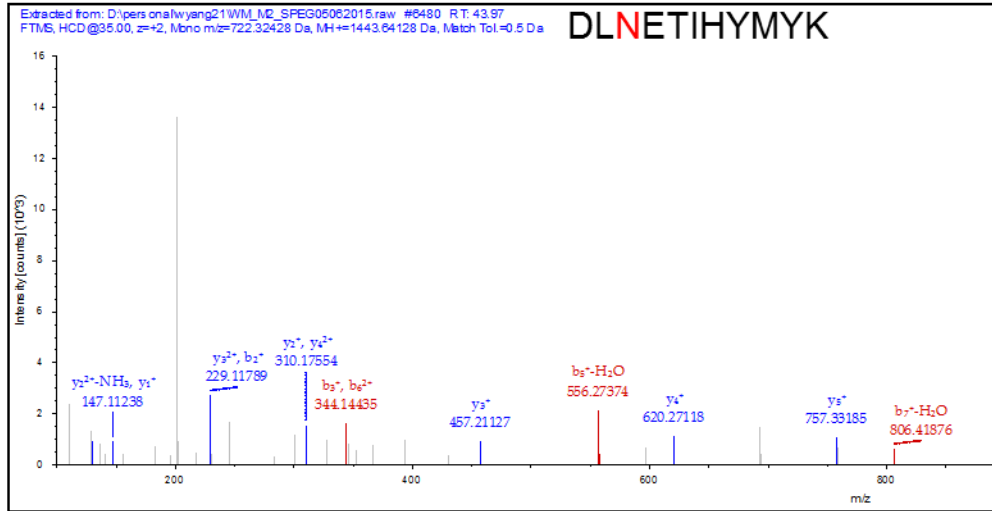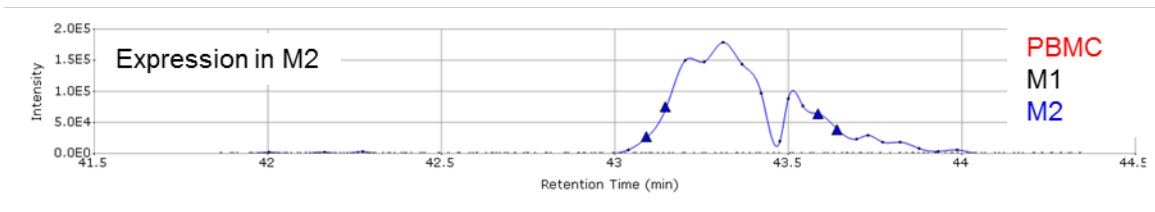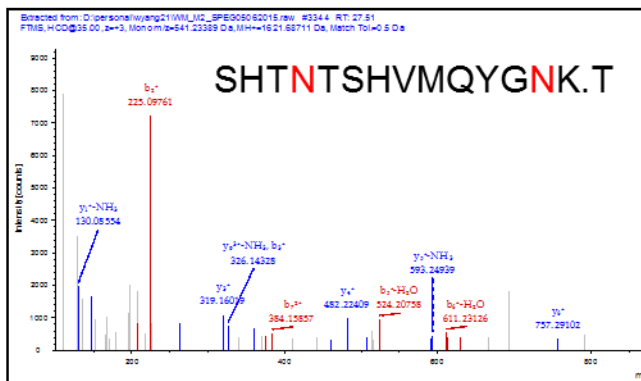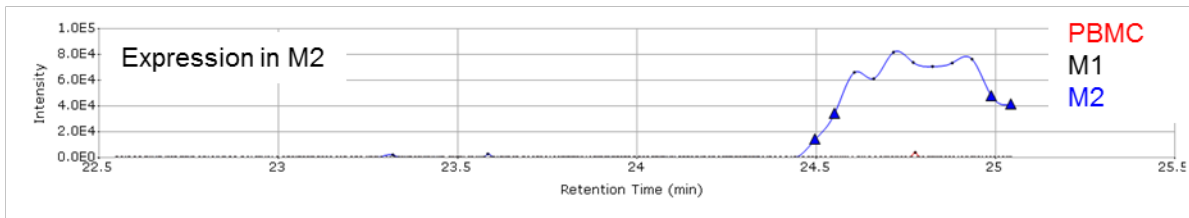

# Legumain

## Glycoproteomic experiment #2

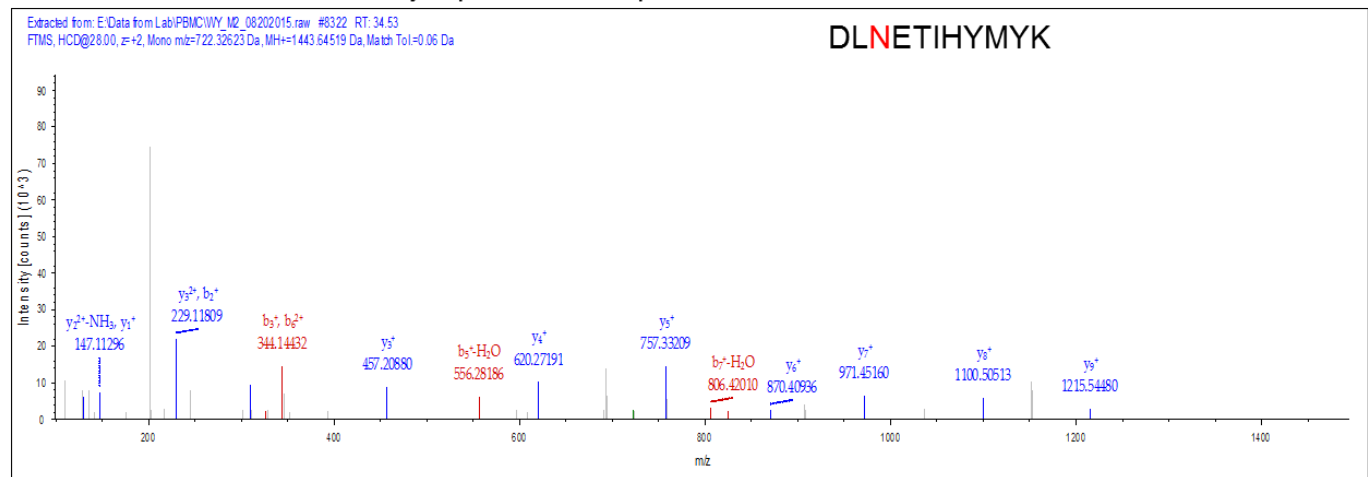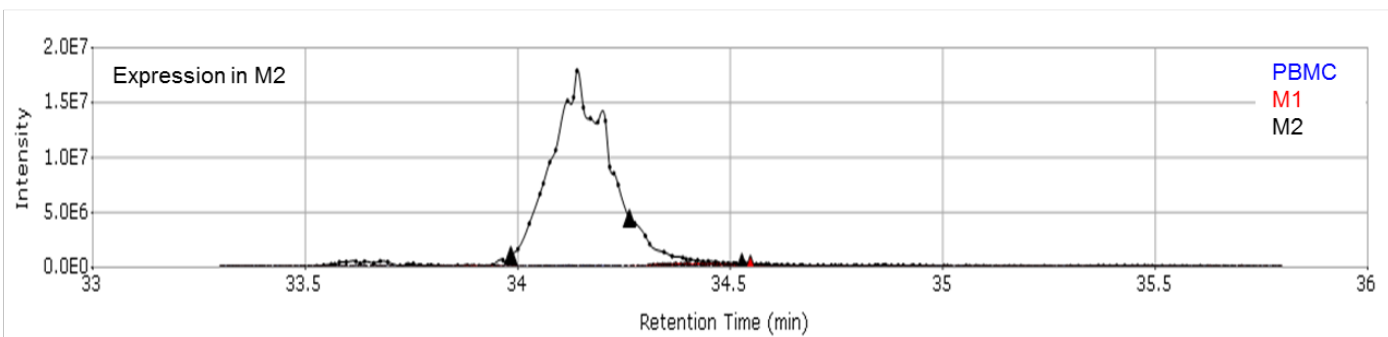

**Figure S4. Differential expression of Legumain in the glycoproteomic experiments.** In either glycoproteomic experiments, the MS/MS spectrum for peptide identification followed by label-free quantitation detecting precursor ions over retention time were shown.



# Sodium/hydrogen exchanger 7

## Glycoproteomic experiment #1

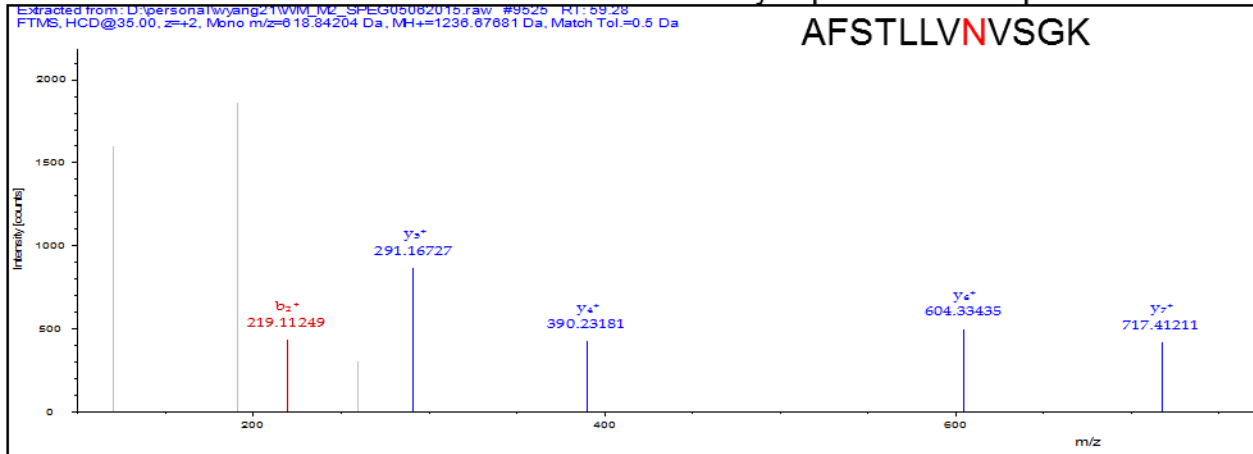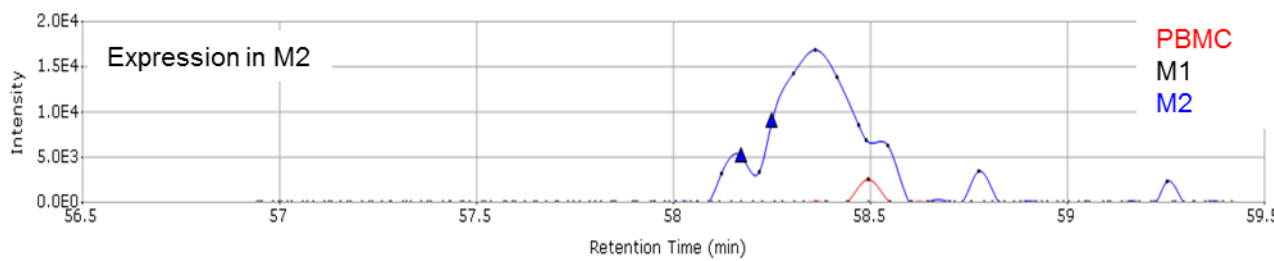

## Glycoproteomic experiment #2

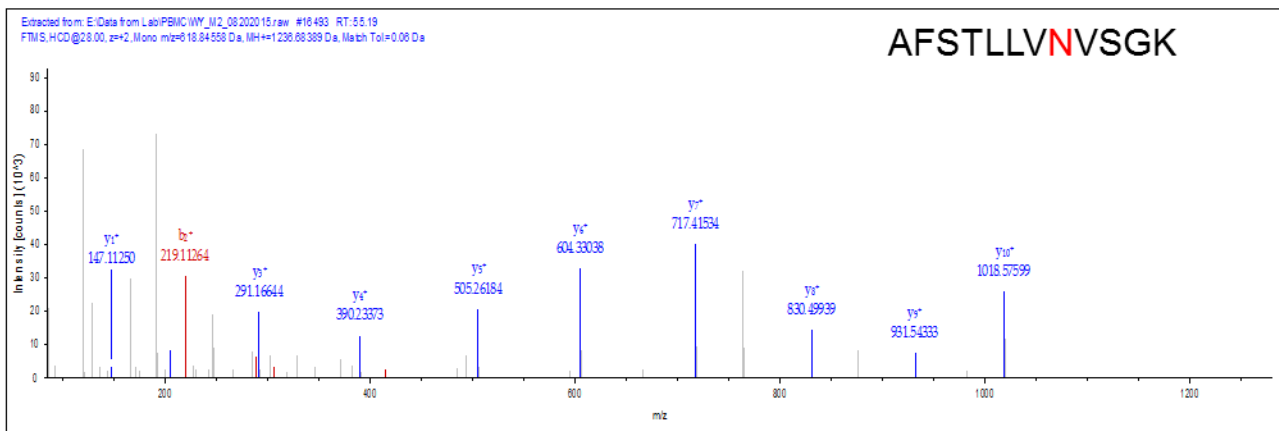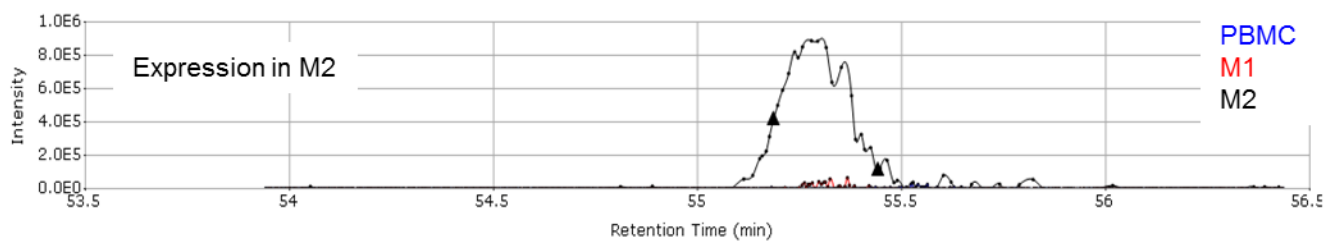

**Figure S5. Differential expression of sodium/hydrogen exchanger 7 in the glycoproteomic experiments.** In either glycoproteomic experiments, the MS/MS spectrum for peptide identification followed by label-free quantitation detecting precursor ions over retention time were shown.

# Lysosome associated membrane glycoprotein 3 precursor

## Glycoproteomic experiment #1

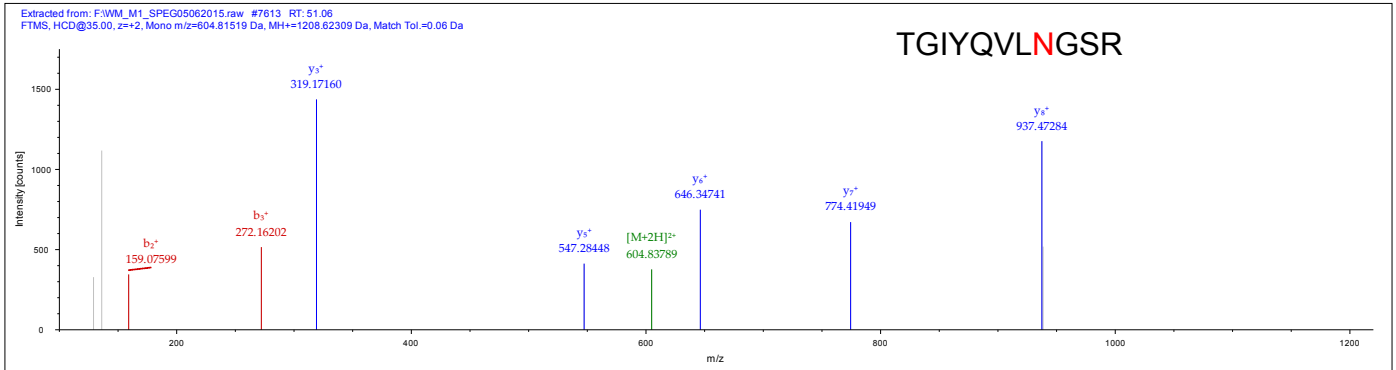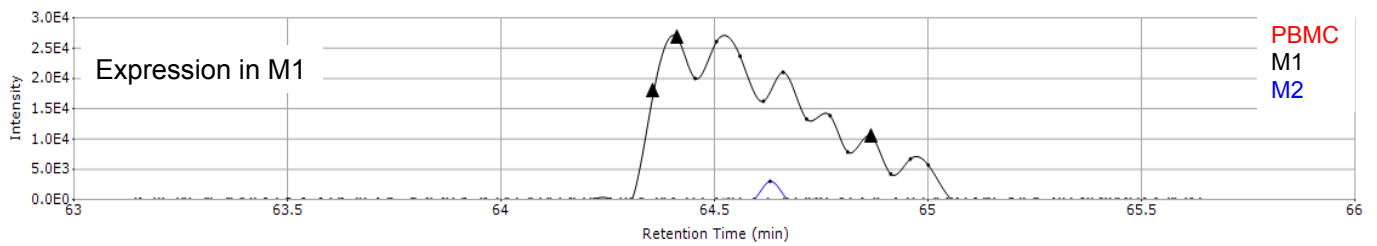

## Glycoproteomic experiment #2

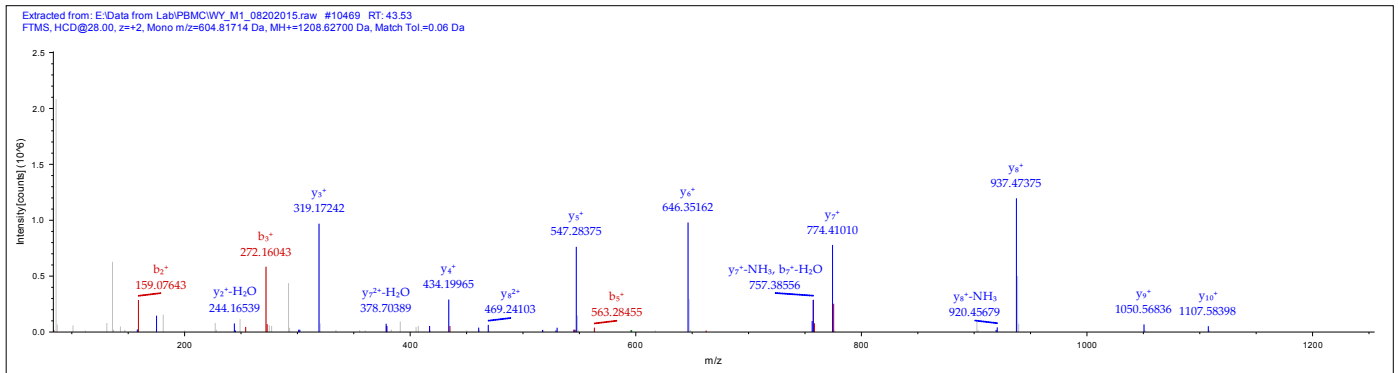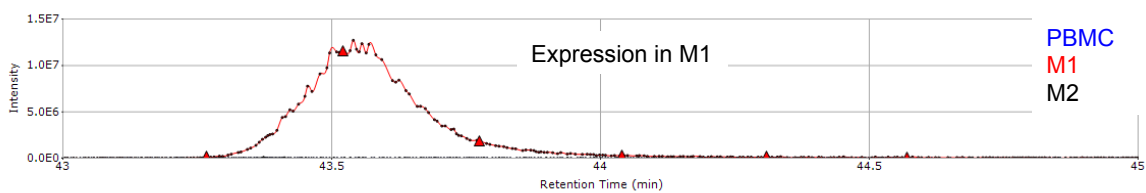

**Figure S6. Differential expression of Lysosome associated member glycoprotein 3 in the glycoproteomic experiments.** In either glycoproteomic experiments, the MS/MS spectrum for peptide identification followed by label-free quantitation detecting precursor ions over retention time were shown.

# L amino acid oxidase isoform 1

## Glycoproteomic experiment #1

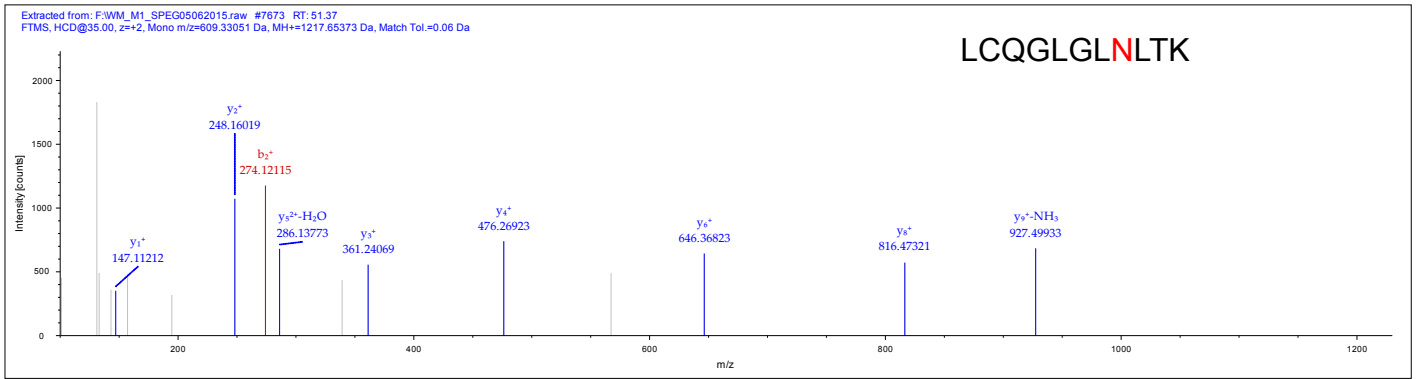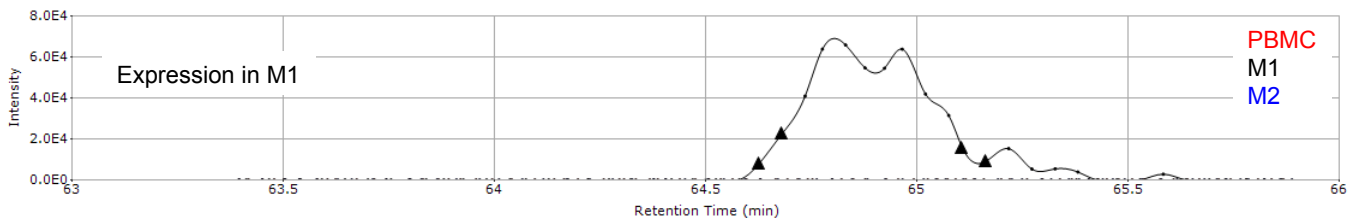

## Glycoproteomic experiment #2

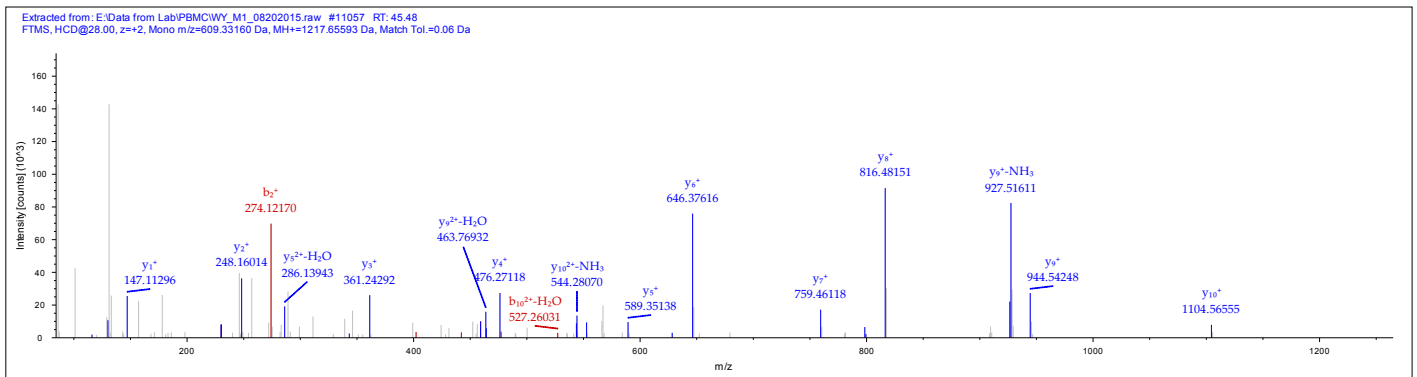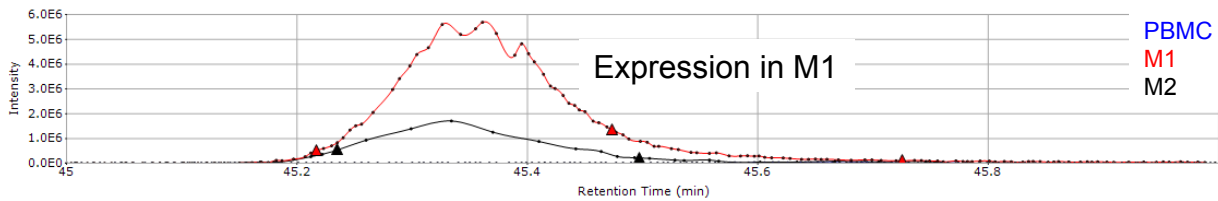

**Figure S7. Differential expression of L amino acid oxidase isoform 1 in the glycoproteomic experiments.** In either glycoproteomic experiments, the MS/MS spectrum for peptide identification followed by label-free quantitation detecting precursor ions over retention time were shown.

**A. Human M1 Macrophages**

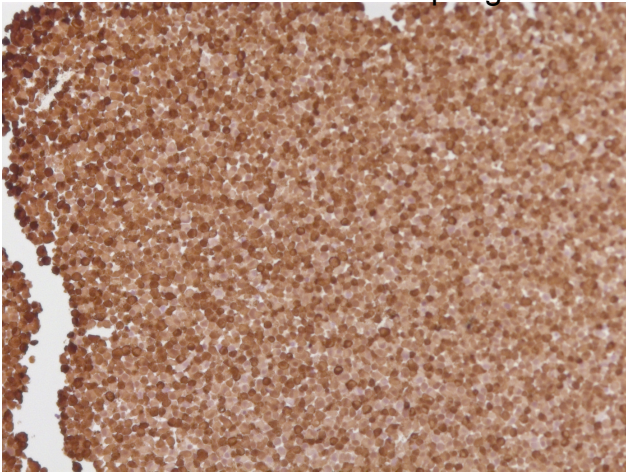

**B. Human mCRPC**

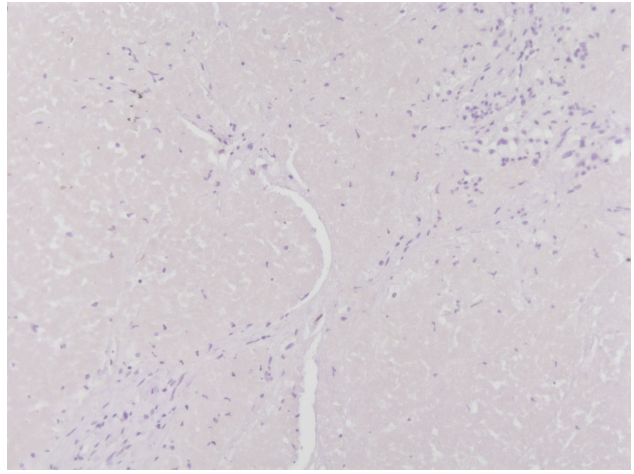

**Figure S8. Indoleamine 2,3 (IDO1) staining of human M1 macrophages and mCRPC tissues.** Tissue cell blocks of human M1 macrophages (**A**) and human mCRPC samples (**B**) were stained for IDO1, a known marker of M1 macrophages.
